# Supplementary material for: New FeS clusters with NO: associative formation of [Fe5S4(NO)8]− and [Fe7S6(NO)10]−, and larger clusters
Source: Royal Society of Chemistry journal article supplement (doi:10.1039/b001738h), 2000-01-01
Supplement: b001738h.doc [file b001738h.doc]

**Supplementary Data for:**

**New FeS clusters with NO: associative formation of [Fe5S4(NO)8]– and [Fe7S6(NO)10]–, and larger clusters.**

**Mark Lewin, Keith Fisher and Ian Dance***

*School of Chemistry, University of New South Wales, Sydney 2052, Australia.*

*E-mail: I.Dance@unsw.edu.au.*

1. **Negative ion electrospray mass spectra of solutions of Na2[Fe2S2(NO)4] and Na[Fe4S3(NO)7]**

Fig S1. FTICR-ES negative ion mass spectrum of Na2[Fe2S2(NO)4] in methanol, 12 minutes after dissolution. The peaks for [Fe4S3(NO)7]– at m/z = 530, and [Fe5S4(NO)8]– at m/z = 647 are growing. At shorter times the peak for [Fe2S2(NO)4H]– at m/z = 297 is dominant.

Fig S2. FTICR-ES negative ion mass spectrum of Na2[Fe2S2(NO)4] in methanol, 40 minutes after dissolution. By this stage there is no peak for [Fe2S2(NO)4H]–, and the peak for [Fe7S6(NO)10]– at m/z = 883 is appearing. Note the absence of other peaks.

Fig S3. FTICR-ES negative ion mass spectrum of Na2[Fe2S2(NO)4] in methanol, 24 hr after dissolution. Note the absence of peaks other than [Fe4S3(NO)7]–, [Fe5S4(NO)8]– and [Fe7S6(NO)10]–.

Fig S4. FTICR-ES negative ion mass spectrum of Na2[Fe2S2(NO)4] in acetonitrile, 20 minutes after dissolution, showing the formation of [Fe4S3(NO)7]– and [Fe5S4(NO)8]–. The weaker peak at m/z 477 is probably [Fe3S5(NO)5]–, and the peak at m/z 412 is probably [Fe3S2(NO)6]–. These peaks disappear soon after this stage.

Fig S5. FTICR-ES negative ion mass spectrum of Na[Fe4S3(NO)7] in methanol, 7 days after dissolution. Note the absence of peaks other than [Fe4S3(NO)7]–, [Fe5S4(NO)8]– and [Fe7S6(NO)10]–.

2. **Absence of [Fe4S4(NO)4]z– and [Fe6S6(NO)6]z–, z = 1 or 2.** The masses of [Fe4S4(NO)4] and [Fe6S6(NO)6] are 471.7 and 707.5 respectively. Peaks at 353.8, 471.7 and 707.5 are not present in the spectra, as is evident in Figs S1 to S5.

3. **Dissociation of NO.**

The spectra in Figs S1 to S5 were obtained with a capillary voltage of ­–30v. Increase of the capillary voltage to –60v caused no change in the spectra. Dissociation of NO commenced at capillary voltages in the range –70 to –80v. Fig S6 shows the dissociation of NO from [Fe7S6(NO)10]– in a spectrum obtained with a capillary voltage of –100v.

Fig S6. FTICR-ES negative ion mass spectrum of a methanol solution of Na2[Fe2S2(NO)4] spiked with NaI, showing the successive dissociations of NO from [Fe7S6(NO)10]– at m/z 883. The capillary voltage was –100v. The isotopomer manifolds centred at m/z 853, 823, 793, 763 correspond to [Fe7S6(NO)x]–, x = 9, 8, 7, 6 respectively. Two mass calibrant peaks are labelled.
